1           **Drought duration determines the recovery dynamics of rice root microbiomes**

2

3           Christian Santos-Medellin<sup>1,a,#</sup>, Zachary Liechty<sup>1,#</sup>, Joseph Edwards<sup>1,b</sup>, Bao Nguyen<sup>1,c</sup>, Bihua  
4                           Huang<sup>2</sup>, Bart C. Weimer<sup>2</sup>, Venkatesan Sundaresan<sup>1,3,\*</sup>

5

6           <sup>1</sup>*Department of Plant Biology, University of California, Davis, Davis, California, USA*

7           <sup>2</sup>*Department of Population Health and Reproduction, 100K Pathogen Genome Project,,  
8           University of California, Davis, Davis, California, USA*

9           <sup>3</sup>*Department of Plant Sciences, University of California, Davis, Davis, California, USA*

10

11           *Current affiliation:*

12           <sup>a</sup>*Department of Plant Pathology, University of California, Davis, Davis, California, USA*

13           <sup>b</sup>*Department of Integrative Biology, University of Texas, Austin, Texas, USA*

14           <sup>c</sup>*Microbiology and Environmental Toxicology Department, University of California, Santa Cruz,  
15           Santa  
16           Cruz, California, USA*

17

18           \* Corresponding author: [sundar@ucdavis.edu](mailto:sundar@ucdavis.edu)

19

20           # Contributed equally to this work

21

## Abstract

22

23 As extreme droughts become more frequent, dissecting the responses of root-associated  
24 microbiomes to drying-wetting events is essential to understand their influence on plant  
25 performance. Here, we show that rhizosphere and endosphere communities associated with  
26 drought-stressed rice plants display compartment-specific recovery trends. Rhizosphere  
27 microorganisms were mostly affected during the stress period, whereas endosphere  
28 microorganisms remained altered even after irrigation was resumed. The duration of drought  
29 stress determined the stability of these changes, with more prolonged droughts leading to  
30 decreased microbiome resilience. Drought stress was also linked to a permanent delay in the  
31 temporal development of root microbiomes, mainly driven by a disruption of late colonization  
32 dynamics. Furthermore, a root-growth-promoting *Streptomyces* became the most abundant  
33 community member in the endosphere during drought and early recovery. Collectively, these  
34 results reveal that severe drought results in enduring impacts on root-associated microbiomes  
35 that could potentially reshape the recovery response of rice plants.

36

37

## Background

38

39 Drought is the largest contributor to world-wide crop loss [1, 2]. In the United States alone,  
40 major drought events between 2011 and 2018 resulted in agricultural losses totaling 78 billion  
41 dollars [3]. With an average of 25% yield reduction under drought [4], rice is particularly  
42 susceptible to this abiotic stress, due in part to its semi-aquatic growth habit and its small root  
43 system [5]. Rice responds to drought episodes through a slew of molecular, physiological, and  
44 morphological changes aimed to mitigate stress and facilitate recovery after rewatering [6]. Plant-  
45 microbe symbioses can further boost stress resistance by enhancing the plant response to  
46 environmental perturbations [7]. As such, harnessing plant-microbe interactions has emerged as  
47 a complementary approach to reduce crop losses associated with drought [8] and understanding  
48 the ecological principles governing root microbiome assembly under environmental stressors has  
49 become a research priority [9–11].

50

51 Drought triggers a compartment-specific restructuring of the rice root microbiota, with  
52 endosphere communities displaying a more pronounced response than rhizosphere communities  
53 [12]. This compositional shift is characterized by a prominent increase of a diverse group of  
54 monoderm bacteria, including Actinobacteria, Chloroflexi, and aerobic Firmicutes. Such  
55 taxonomic signatures are consistent across multiple rice cultivars and soil types. Similar trends

55 have been independently observed in a wide variety of plant species, across cereals and dicots  
56 [13, 14], indicating that monoderm enrichment is a phylogenetically conserved response in plants  
57 under drought stress. While these cross-sectional studies have shed light on the compositional  
58 changes that root-associated microbiomes undergo during drought, the temporal dynamics upon  
59 rewatering are less understood. This recovery period is particularly relevant as both plants and  
60 microbes undergo quick physiological changes that can reshape the underlying network of biotic  
61 interactions [8].

62 Since rhizosphere and endosphere communities undergo compositional changes  
63 throughout the life cycles of their hosts [15–20], the temporal development of root microbiomes  
64 should also be considered when investigating community dynamics in response to drought [17,  
65 18]. In irrigated rice, rhizosphere and endosphere communities display a highly conserved  
66 temporal development characterized by a rapid turnover during the early vegetative stages  
67 followed by a relative stabilization as the host transitions into flowering [17, 20]. These community  
68 dynamics are driven by a phylogenetically diverse group of microbial taxa that experience  
69 consistent longitudinal shifts across multiple geographic regions and growing seasons [17].  
70 Previously, we showed that drought-stressed rice root communities are developmentally delayed  
71 compared to well-watered communities [17]. Similarly, a study in sorghum reported a nearly  
72 complete halt in microbiota turnover during pre-flowering drought stress [18]. Assessing the  
73 impact of this developmental delay in the recovery period can reveal the extent to which drought  
74 disrupts the temporally coordinated interplay between host and root microorganisms.

75 As drought episodes become longer and more frequent [1, 21], it is necessary to determine  
76 the impact of an increasingly changing environment on plant-associated microbiomes. In  
77 particular, evaluating the resilience of root communities (*i.e.*, their rate of recovery after a  
78 disturbance) can help us determine the permanence of drought-mediated alterations through the  
79 life cycle of their host. As highlighted in a recent review, there is a “need for improved mechanistic  
80 understanding of the complex feedbacks between plants and microbes during, and particularly  
81 after, drought” [8]. Here, we present a detailed temporal profiling of the rhizosphere and  
82 endosphere communities of rice plants grown under a range of drought stress durations. We find  
83 that extended drought produces lasting changes to root microbiota composition, with persistent  
84 phyla-dependent patterns of enrichment and depletion, and involving putative beneficial  
85 microbes. The findings have implications relevant to strategies to harness microbial communities  
86 for drought-tolerance in field crops.

87

88

89

## Results

90

### 91 **Experimental design and sequencing stats**

92 To characterize the effect of drought on the temporal progressions of root-associated  
93 communities, we exposed rice plants (*Oryza sativa* ssp. *japonica* variety M206), grown in  
94 agricultural soil under controlled greenhouse conditions, to one of three increasingly longer  
95 drought periods: DS1 (11 days), DS2 (21 days), and DS3 (33 days). Given that microbiome  
96 succession is highly dynamic during the vegetative growth phase of rice [17], all drought  
97 treatments were initiated at 41 days after transplantation, before plants transitioned to the  
98 reproductive stage and microbiome composition stabilized. As a control treatment (WC), we kept  
99 an additional set of rice plants under well-watered conditions throughout the whole experiment.  
100 For each of the four watering regimes (WC, DS1, DS2, and DS3), plants were consistently  
101 sampled every ~10 days for a total of 13 collection time points spanning 136 days. This collection  
102 scheme covered the complete life cycle of rice and allowed us to track microbiome succession  
103 before, during, and after drought (**Figure 1A**). For each plant sampled, we profiled the bacterial  
104 and archaeal diversity associated with the rhizospheric and endospheric communities via high-  
105 throughput amplicon sequencing of the V4 region of the 16S rRNA gene. After filtering organellar  
106 sequences and removing non-persistent OTUs (defined as OTUs not present in at least 5% of all  
107 samples), we identified 4,135 OTUs (mean sequencing depth = 20,740 reads).

108

### 109 **Beta-diversity patterns**

110 Root compartment was the major driver of microbiome composition as evidenced by a clear  
111 separation between rhizosphere and endosphere communities across the first axis of an  
112 unconstrained principal coordinates analysis (PCoA) performed on weighted UniFrac distances  
113 (**SFigure 1A**). Moreover, a permutational multivariate analysis of variance (PerMANOVA)  
114 indicated that root compartment explained more than 62.8% of the variation in the whole dataset  
115 ( $P < 0.001$ ). Therefore, to better explore the impact of drought treatment, collection time, and their  
116 interaction on each compartment, we ran a PerMANOVA on rhizosphere and endosphere  
117 samples independently. In both cases, all main and interaction effects were significant (**Table 1**).

118 To further examine the effect of drought duration on microbiome dynamics, we explored  
119 the longitudinal trends of beta-diversity captured by the first axis of independent PCoAs performed  
120 on each compartment (**Figure 1C-D, SFigure 1C-F**). In both rhizosphere and endosphere  
121 communities, PCo1 tracked the compositional development that root communities undergo during  
122 the lifecycle of rice plants as evidenced by the progressive transition of early to late time points

123 along the axis. Additionally, PCo1 displayed drought-mediated shifts in community composition  
124 throughout time: while all watering regimes followed similar trajectories before drought onset (41-  
125 day-old mark), drought-treated plants started diverging from well-watered communities as soon  
126 as irrigation was suspended. The separation between control and stressed communities  
127 increased for as long as drought conditions were kept, with 31-day-stressed communities (DS3)  
128 showing the largest deviation from well-watered samples. Finally, drought treatments presented  
129 differential recovery dynamics upon rewatering: while both DS1 and DS2 samples recovered  
130 relatively quickly, DS3 communities remained significantly altered after drought stress was  
131 ceased (adjusted  $P < 0.05$ , asterisks in **Figure 1C-D**). This significant deviation from controlled  
132 communities was sustained for 50 days in the endosphere whereas it only lasted for 20 days in  
133 the rhizosphere, suggesting potential differences in community resilience across compartments.  
134 Such pattern contrasts with the temporal trends observed in soil water content as soil percent  
135 moisture was significantly reduced for all drought treatments during the stress period but  
136 immediately returned to control levels after irrigation was resumed (**Figure 1B**). Thus, despite soil  
137 water content being fully restored, prolonged drought hinders the ability of root communities to  
138 quickly recover.

139  
140

#### 141 **Drought-responsive taxa follow distinct longitudinal trends within and between** 142 **compartments.**

143 To identify taxa affected by watering regime throughout time, we fitted negative binomial models  
144 to the relative abundances of individual OTUs and ran pairwise Wald tests contrasting well-  
145 watered controls (WC) against each drought treatment (DS1, DS2, and DS3) in each  
146 compartment at each collection time point. We found a total of 428 rhizospheric OTUs and 284  
147 endospheric OTUs affected by treatment in at least one comparison (**Figure 2A, STable 1**,  
148 adjusted  $P < 0.05$ ). The temporal distribution of significant effects among these differentially  
149 abundant OTUs followed distinct patterns in each compartment: in the rhizosphere, significance  
150 was mostly observed during the drought period; in the endosphere, it widely extended to the  
151 recovery phase of the experiment, especially for treatment DS3.

152 While this approach detected clear ecological signals driven by drought stress (*e.g.*, the  
153 number of differentially abundant OTUs was proportional to duration of stress), it also identified  
154 OTUs affected by other, potentially stochastic, processes. For example, multiple OTUs were  
155 found to be significantly affected by watering treatment in the collection time points preceding  
156 drought onset, when conditions were identical across treatments (**Figure 2A**). This effect was  
157 more pronounced in the endosphere communities, which exhibited greater within-group variation

158 than rhizosphere communities (**SFigure 1B**). Thus, to identify coherent patterns of drought  
159 response in the set of differentially abundant OTUs, we performed hierarchical clustering on the  
160  $\log_2$  fold changes computed across all comparisons. (**STable 2, SFigures 2**). This method  
161 distinguished 3 rhizospheric and 2 endospheric modules displaying clear longitudinal trends  
162 across drought treatments. (**Figure 2B**).

163 One rhizospheric module consisted of 195 OTUs whose relative abundances increased  
164 under drought stress. Such enrichment was proportional to the duration of stress and was mostly  
165 constrained to the span of suspended irrigation in each treatment. The OTUs exhibiting this  
166 transient enrichment belonged mainly to the phyla Actinobacteria, Gemmatimonadetes, and  
167 Chloroflexi. In contrast, the other two rhizospheric modules showed clear signatures of  
168 abundance depletion under drought conditions, although each with unique recovery dynamics:  
169 while 126 OTUs were transiently depleted, *i.e.*, their relative abundances were quickly restored  
170 after irrigation was resumed; 51 OTUs were persistently depleted, *i.e.*, their relative abundances  
171 remained decreased weeks after stress was ceased. This latter pattern was particularly  
172 conspicuous in rhizospheres of plants that underwent 31 days of drought (DS3). While both  
173 depletion modules were enriched in OTUs classified as Acidobacteria, Betaproteobacteria, and  
174 Deltaproteobacteria, each one featured unique patterns at a lower taxonomic resolution (**SFigure**  
175 **3**). On one hand, the majority of transiently depleted Betaproteobacteria belonged to order MND1  
176 whereas almost all persistently depleted were Rhodocyclales. On the other hand,  
177 Deltaproteobacteria classified as Myxococcales and Desulfuromonadales were prominent in the  
178 transient and persistent modules, respectively.

179 Out of the 2 endospheric modules, one encompassed 30 OTUs enriched under drought  
180 while the other one contained 81 OTUs depleted under drought. In both cases, these shifts in  
181 abundances persisted after drought stress was suspended, albeit to different extents for each  
182 module. For OTUs positively impacted by drought, the increase in relative abundances lingered,  
183 depending on the specific treatment, up to ~10-20 days after irrigation was resumed. Interestingly,  
184 more than 80% of OTUs in this semi-persistently enriched module belonged to the phylum  
185 Actinobacteria. In contrast, for OTUs negatively impacted by drought, depletion relative to well-  
186 watered controls was observed throughout the whole recovery phase. Moreover, similar to the  
187 results observed in the rhizosphere, several persistently depleted OTUs were classified as  
188 Myxococcales and Rhodocyclales (**SFigure 3**). Together, these results indicate that  
189 phylogenetically distinct groupings of bacterial taxa follow diverse trajectories throughout drought  
190 stress and recovery in root-associated compartments.

191

192 **A highly occurring *Streptomyces* becomes the most abundant taxa in endosphere**  
193 **communities during and immediately after drought.**

194 Given the strong taxonomic signature displayed by the set of semi-persistently drought-enriched  
195 OTUs (**Figure 2B**), we further explored the compositional trends of each individual actinobacteria  
196 within this module. In particular, we calculated the abundance-occupancy curves of rhizosphere  
197 and endosphere communities and located each OTU along these spectra (**Figure 3A**). Overall,  
198 semi-persistently enriched actinobacteria were among the most abundant and occurrent  
199 members of root-associated communities, especially in the endosphere. One *Streptomyces*  
200 taxon, OTU 1037355, was notably predominant: not only was it detected in all collected samples,  
201 but its mean relative abundance was greater than that of 99% and 97% of all OTUs in the  
202 endosphere and rhizosphere communities, respectively. Furthermore, analyzing its temporal  
203 dynamics across treatments, we found that OTU 1037355 became the most abundant taxon in  
204 endosphere communities by the end of the DS2 and DS3 drought periods, reaching a mean  
205 relative abundance of 13.5% (**Figure 3B**). Additionally, OTU 1037355 remained the most  
206 abundant taxon in the endosphere during the early stages of recovery. In rhizosphere  
207 communities, the drought-mediated enrichment of OTU 1037355 was less prominent as it only  
208 reached a maximum relative abundance of 1.3% in drought-stressed samples. Moreover, even  
209 though the abundance of this OTU increased during the drought period, it immediately declined  
210 after irrigation was resumed. Thus, despite being significantly affected by drought in both  
211 communities, OTU 1037355 exhibited compartment-specific recovery trends.

212 We then assessed if the pattern of sustained enrichment displayed by OTU 1037355 was  
213 a reproducible feature of endosphere communities by analyzing its longitudinal dynamics in an  
214 independent drought experiment performed on the same rice cultivar grown in the same  
215 agricultural soil. Briefly, one-month old plants were drought-stressed for 21 days and allowed to  
216 recover for 7 days (see Methods). Samples were collected each week to track the drought-  
217 mediated temporal shifts and post-disturbance trends. The microbial profiles confirmed that this  
218 OTU was significantly enriched during and immediately after the imposition of drought conditions  
219 (**SFigure 4**). Moreover, this shift was even more conspicuous as the mean relative abundance of  
220 OTU 1037355 reached up to 24.0% of the total community in drought-stressed samples.

221  
222 **A *Streptomyces* isolate classified as OTU 1037355 is a root growth promoting bacteria**

223 To assess if this highly occurring *Streptomyces* taxon was part of the readily culturable fraction of  
224 the root microbiota, we screened a set of bacterial isolates previously collected from rice-  
225 associated rhizosphere and endosphere communities (see Methods) and found nine isolates

226 classified as OTU 1037355. We then compared these isolates against the most prevalent  
227 sequence variant that mapped to OTU 1037355 in our longitudinal drought experiment; this  
228 sequence variant comprised 63.4% of all sequences mapping to that OTU (**SFigure 5A**). Five of  
229 the isolates differed by a single nucleotide, and one isolate, SLBN-177, was additionally derived  
230 from the same soil source as the longitudinal drought experiment. The full 16S rRNA gene of  
231 SLBN-177 was sequenced, and compared against the NCBI 16S rRNA gene database to further  
232 refine its taxonomic classification. We found that SLBN-177 shared 100% similarity with  
233 sequences from *Streptomyces pratensis*, *Streptomyces anulatus*, and *Streptomyces praecox* (*S.*  
234 *praecox* has been proposed as a synonym of *S. anulatus* [22]). Due to the sequence similarity  
235 and source of isolate, we further investigated the effects of SLBN-177 on rice phenotypes.

236 To evaluate the effect of *Streptomyces* SLBN-177 on rice growth phenotypes, seeds were  
237 inoculated with one of three microbial treatments: SLBN-177, SLBN-111, or a mock control.  
238 SLBN-111 is an Actinobacteria isolate from the genus *Microbacterium* and its associated OTU,  
239 1108350, was found in low abundance in both the rhizosphere and endosphere communities  
240 (**SFigure 5B**). Unlike many other Actinobacteria taxa, OTU 1108350 was not significantly altered  
241 by drought in any compartment. Due to the weak association of OTU 1108350 with the plant and  
242 its stability under drought, SLBN-111 was selected to distinguish the effects of SLBN-177 on rice  
243 seedlings from a general response caused by the introduction of a high abundance of a foreign  
244 microbe. Inoculated seeds were grown for 10 days in an axenic closed system, followed by a 14  
245 day period of non-sterile drought stress in an open system (with half the plants still fully watered),  
246 followed by 7 days of recovery. Plants were then harvested and root and leaf growth parameters  
247 were measured (**Figure 4A**, **SFigure 6**). A principal component analysis revealed that both  
248 watering and microbial treatments influenced the phenotypes of rice plants (**Figure 4B**). Watering  
249 treatment was the driving factor separating samples along the first axis while microbial treatment  
250 distinguished samples along the second axis. Interestingly, SLBN-177-inoculated plants clustered  
251 separately from mock- and SLBN-111-inoculated plants. Furthermore, root length was the main  
252 variable distinguishing microbial treatments (**Figure 4B**; **STable 3**). Notably, contrasts  
253 demonstrated that roots of SLBN-177-treated plants were significantly longer than mock- and  
254 SLBN111-treated plants in both well-watered and drought conditions (**Figure 4C**). Microbial  
255 treatments did not significantly affect any other measured trait; however, all phenotypic  
256 measurements were significantly reduced by drought (**SFigure 7A**, **STable 3**).

257 To explore potential mechanisms responsible for the root elongation, the genome of  
258 SLBN-177 was sequenced, assembled, and annotated. The assembly yielded 7.78 MB of  
259 sequence and 6,975 putative coding sequences. Mapping genes to KEGG pathways identified



260 genes involved in the production of indole-3-acetic acid (IAA) through the indole-3-acetamide  
261 (IAM) pathway, including *iaaM* (a tryptophan 2-monooxygenase) and *amiA2* (a putative amidase),  
262 potentially involved in the first and second steps of this pathway, respectively. The *iaaM* gene  
263 shared an 88.5% amino acid similarity with homologs from *Streptomyces coelicolor* and 88.9%  
264 with homologs from *Streptomyces scabiei*, both of which have previously been implicated in IAA  
265 biosynthesis [23, 24]. Additionally, we identified gene clusters associated with siderophore and  
266 antimicrobial biosynthesis (**STable 4**).

267 To confirm that SLBN-177 colonized the roots of rice plants, we performed 16S rRNA gene  
268 profiling on the endospheres of a subset of samples and compared the relative abundance of  
269 microbial reads to organellar reads. The mean relative abundance of OTU 1037335 on SLBN-  
270 177-treated plants reached 5.7% and 30.7% in well-watered and drought-recovered samples,  
271 respectively, suggesting the enrichment of SLBN-177 persists in the recovery phase, as observed  
272 in OTU 1037355 in the previously described experiments (**SFigure 7B**). In contrast, OTU  
273 1108350 was barely detected in SLBN-111 treated samples, reaching a maximum relative  
274 abundance of 0.001%. Two drought-recovered control plants also had notable relative  
275 abundances of OTU 1037355, which could be a consequence of the open system portion of the  
276 experiment. However, the relative abundances of OTU 1037355 in these plants were much lower  
277 than drought-recovered plants inoculated with SLBN-177 (**SFigure 7B**). Collectively, these results  
278 indicate that OTU 1037355 is a plant-growth promoting *Streptomyces* that is a key contributor to  
279 the compositional dynamics of endosphere communities during drought and recovery.

280

### 281 **Drought permanently delays rhizosphere and endosphere microbiome development.**

282 Relative abundances of root-associated taxa follow reproducible longitudinal trends that  
283 can be used to track root microbiome maturation throughout time by training random forests  
284 models [17]. Using this approach on field-grown samples, we have previously shown that drought-  
285 stressed plants host a developmentally immature microbiota [17]. Given this result, however, it is  
286 unknown whether microbiome immaturity persists upon rewatering. To explore this possibility, we  
287 used samples from well-watered plants to train separate full random forest models for each  
288 compartment by regressing OTU relative abundances as a function of host chronological age. For  
289 each compartment, we ranked each OTU based on age-predicting importance and selected the  
290 top 65 (a threshold identified through cross-validation - **SFigure 8A**) to generate sparse random  
291 forest models (**STable 4**). Similarly to the age-discriminant taxa detected in our previous field  
292 study [17], these top OTUs could be classified as early, late, or complex root colonizers based on  
293 their relative abundance patterns through time: early colonizers displayed initial high abundances

294 that progressively declined, late colonizers exhibited initial low abundances that progressively  
295 increased, and complex colonizers comprised OTUs that didn't fit any of these two trends  
296 (**SFigure 8C, STable 5**). Among the set of early endosphere colonizers, most were classified as  
297 Chloroflexi and Betaproteobacteria (mainly Burkholderiales), whereas the set of early rhizosphere  
298 colonizers were more phylogenetically diverse. In contrast, both compartments had a clear  
299 enrichment of Deltaproteobacteria (mainly Myxococcales) and Betaproteobacteria (mainly  
300 Rhodocyclales) in the set of late colonizers (**SFigure 9**).

301 The 65-taxon sparse models explained the 89.06% and 90.08% of variance related to  
302 plant age in the rhizosphere and endosphere communities, respectively. Furthermore, these  
303 models accurately predicted plant age on a validation set of well-watered samples, indicating that  
304 this approach was able to capture the consistent taxonomic shifts observed during normal root  
305 microbiome succession. We then applied the sparse random forest models to each of three  
306 drought regimes to assess the effect of drought on microbiome succession. We observed a clear  
307 deviation from the baseline development established by well-watered controls (**Figure 5A**). To  
308 further measure this divergence, we calculated the relative microbiome maturity of each sample  
309 as the difference between the predicted microbiome age and the baseline microbiome age of well-  
310 watered plants collected at the same chronological age (**Figure 5B**). The results showed that,  
311 before drought onset, all watering regimes tracked normal microbiome development. However,  
312 microbiome progression was interrupted during drought and relative microbiome maturity became  
313 increasingly delayed. Furthermore, the extent of this microbiome immaturity was proportional to  
314 the duration of stress, with DS3 communities showing the highest departure from baseline  
315 development. For DS2 and DS3 samples, this microbiome immaturity persisted throughout the  
316 rest of the life cycle, even after irrigation was resumed.

317 To understand the compositional changes driving the drought-mediated delay in root  
318 microbiome development, we analyzed the abundance patterns of age-discriminant taxa across  
319 watering treatments. In both compartments, we observed a clear shift in the transition of  
320 dominance between early and late colonizers (**Figure 5C**). In the rhizosphere, this transition was  
321 detected at the ~50 and ~90 day-old marks in WC and DS3 plants, respectively; in the  
322 endosphere, the transition was detected at the ~70 and ~120 day-old marks in WC and DS3  
323 plants, respectively. This temporal shift in root microbiome assembly was mostly linked to a delay  
324 in the onset of late colonizers as evidenced by a persistent decrease in their relative abundances  
325 upon drought stress. Additionally, there was a considerable overlap between the set of late  
326 colonizers and the differentially abundant OTUs assigned to the persistently depleted modules  
327 detected in the rhizosphere and endosphere communities (**SFigure 8B**). Overall, these results

328 indicate that drought stress permanently delayed microbiome development by affecting the  
329 recruitment of late colonizers.

330

331

## Discussion

332

333 Here, we provide a detailed characterization of the drought-mediated changes and post-  
334 disturbance dynamics of root microbiomes through the life cycle of rice plants. We found that both  
335 the magnitude of compositional changes undergone during drought and the capacity to fully  
336 recover upon rewatering were significantly affected by the duration of drought stress experienced  
337 by the host and its associated bacterial and archaeal communities. In particular, we show that  
338 prolonged drought led to a severe microbiome restructuring that persisted even after irrigation  
339 was reestablished. Moreover, endosphere communities remained altered longer than rhizosphere  
340 communities, suggesting that the compartment-specific responses to drought previously reported  
341 for rice [12] and other angiosperms [13, 14] extend to the recovery period. The observed  
342 permanence of drought-mediated changes contrasts with the rapid resilience recently reported  
343 for the root microbiomes of sorghum, in which the relative abundances of Actinobacteria  
344 progressively increased over the course of six weeks of drought but quickly returned to pre-  
345 drought levels within a week of rewatering [18]. These conflicting results could stem from  
346 differences in drought tolerance between the two crops since sorghum, a naturally drought  
347 tolerant C4 plant with a deep root system, is better adapted to arid conditions than rice, a C3 plant  
348 with shallow roots [25–27]. Expanding the characterization of recovery dynamics to a broader  
349 range of hosts is necessary to advance our understanding of root microbiome resilience.

350 Hierarchical clustering of differentially abundant OTUs further revealed modules of  
351 drought-responsive taxa with distinct recovery dynamics: while some OTUs were transiently  
352 impacted by drought (*i.e.*, changes in their relative abundances were mainly constrained to the  
353 period of stress), others were persistently affected throughout recovery. These diverse recovery  
354 patterns could stem from differences in life strategies and metabolic capabilities among root-  
355 associated microorganisms. For instance, copiotrophs could recover more quickly than  
356 oligotrophs as they exhibit higher growth rates and lower resource use efficiency [28]. Given that  
357 rewetting of dry soils releases specific forms of carbon and nitrogen to the environment [29], the  
358 ability to metabolize these liberated resources could also facilitate a quick recovery. For example,  
359 soil bacteria communities recovering from drought have been associated with CO<sub>2</sub> and N<sub>2</sub>O  
360 fluxes [30]. In contrast, the re-oxygenation of soils during drought could impact anaerobic  
361 microorganisms. Under flooded conditions, rice paddies become more reduced over time,

362 allowing a succession of taxa that respire increasingly energetically unfavorable compounds [31].  
363 Events that re-oxygenate the soil inhibit growth and activity of anaerobic bacteria that require a  
364 reduced state for more energetically unfavorable forms of metabolism [32, 33]. Notably, several  
365 persistently depleted taxa are known anaerobes that could be affected negatively by re-  
366 oxygenation, including genera *Desulfovibrio* (reduces sulfate), *Geobacter* (reduces iron and other  
367 metals), and *Anaeromyxobacter* (reduces various metals)[34–37]. Future metagenomic surveys  
368 of the functions enriched across different recovery strategies could help us better understand the  
369 processes driving this temporal differentiation.

370 Additionally, plant-microbe interactions could impact the responses of rhizosphere and  
371 endosphere microorganisms during and after drought. Root exudation is a temporally dynamic  
372 process that can promote or inhibit the growth of particular microbial taxa [38]. It has been shown  
373 that drought and rewetting can modify exudate composition [39–41], which in turn could alter the  
374 activity of microorganisms at the root-soil interface [42]. Drought can also affect the growth and  
375 architectural properties of roots [43], potentially reshaping microbiome composition [44, 45].  
376 Finally, rice plants can respond to drought stress by delaying flowering anywhere from 4.5 days  
377 to 22 days [46–49]. This developmental arrest could impact root microbiome assembly processes  
378 that rely on temporally-staged host-mediated signaling. Interestingly, using a random forest  
379 approach, we found that the temporal progressions of rhizosphere and endosphere communities  
380 were also interrupted during prolonged drought stress (DS2 and DS3). While similar delays in  
381 microbiome development have been recently reported [17, 18], our post-disturbance sampling  
382 scheme allowed us to further evaluate if this drought-associated immaturity persisted after  
383 irrigation was resumed. We found that root communities remained underdeveloped throughout  
384 the whole recovery period due to a delay in the arrival of late root colonizers, many of which were  
385 part of the OTUs identified as persistently depleted in our differential abundance analysis. Late  
386 colonizing taxa have been recently shown to follow reproducible temporal abundance patterns in  
387 the rhizosphere and endosphere communities of different rice genotypes grown across  
388 geographically distant areas and over multiple growing seasons [17]. This high degree of  
389 conservation suggests that plant selectivity might play a key role in the late-stage assembly  
390 dynamics of root microbiomes, further hinting that the drought-induced delay of late colonizers  
391 observed in our study might be linked to host-mediated processes.

392 A characteristic response of host-associated drought-stressed microbiomes is the relative  
393 enrichment of Actinobacteria, which is broadly shared across a wide diversity of plants [12–14]  
394 and has been shown to correspond to an increase in the absolute abundance of members of this  
395 phylum [18, 50]. While the implications of Actinobacteria enrichment are not fully understood,

396 there is evidence that it is at least partially mediated by the host [18]. Furthermore, in the context  
397 of drought stress, a recent study found a positive correlation between drought tolerance in  
398 angiosperms and the relative abundance of an endospheric *Streptomyces*, suggesting a potential  
399 beneficial role under stress [14]. Here, we have found that, in addition to a drought-mediated  
400 increase in their relative abundances, several Actinobacteria displayed a unique recovery trend  
401 that is both compartment-specific and dependent on the degree of drought stress. The most  
402 prominent member of these taxa, OTU 1037355, became the most abundant member of the  
403 endosphere community during and immediately after the stress period. This pattern of sustained  
404 enrichment and prevalence was further confirmed in an independent drought experiment,  
405 indicating that this is a reproducible temporal trend of the root-associated communities of rice.  
406 Inoculation of rice seedlings with a corresponding isolate, SLBN-177, resulted in increased root  
407 length under both drought and well watered conditions. Genome sequencing of SLBN-177  
408 identified the *iaaM* gene, encoding the enzyme Trp-2-monooxygenase involved in the first step of  
409 the auxin analog indole-3-acetic acid (IAA) through the indole-3-acetamide pathway [51]. This  
410 gene has previously been identified in plant-growth promoting *Streptomyces* [23]. Also identified  
411 in the genome was the putative amidase *amiA2*, which could catalyze the second reaction of  
412 indole-3-acetamide to IAA. While the increased root growth in our experiment suggests an  
413 Actinobacteria-mediated increase in phytohormone biosynthesis, our system was not designed  
414 to test other common methods of plant growth promotion employed by *Streptomyces*, specifically  
415 by protecting the host through the inhibition of opportunistic pathogens. The genome of SLBN-  
416 177 contains gene clusters involved in the synthesis of antibiotics, which could inhibit the activity  
417 of these pathogens, and siderophores, which can provide iron to the host as well as trigger  
418 induced systemic resistance [52–54]. The presence of these gene clusters suggests that a further  
419 investigation of SLBN-177 is needed to fully understand its interaction with the host plant.

420 The prominence of SLBN-177 in the microbial community during and after drought, paired  
421 with its plant growth promoting mechanism, suggests functional implications for the microbiome  
422 restructuring and persistence. Given that highly abundant community members are likely to play  
423 key roles in the network of microbe-microbe and host-microbe interactions, it is possible that the  
424 enrichment of this OTU could have a major impact on rice plants during critical periods of  
425 environmental fluctuations. As extreme climate events become more prevalent, crops will likely  
426 experience multiple periods of intermittent drought within a growing season [55], and the ability to  
427 quickly recover and prepare for future drought events could be vital for survival. Plants are able  
428 to prepare for these future drought events through the development of a stress memory, a series  
429 of morphological, molecular, and physiological modifications that plants undergo during an initial

430 drought episode that primes a more robust response to subsequent drought events [56, 57]. For  
431 example, some rice cultivars increase their root plasticity in the recovery period after an initial  
432 drought event, which allows the roots to penetrate hardened soil [57]. After a repeat drought event,  
433 cultivars with increased root growth responses to the initial drought event had an increase in root  
434 water uptake, stomatal conductance and shoot growth compared to those that did not [58]. As an  
435 extended root phenotype [59], rhizosphere and endosphere communities might also contribute to  
436 this stress memory. In particular, drought-mediated compositional changes that persist during the  
437 recovery period could amplify the response of plants to future drought events.

438

439

## Methods

440

### 441 *Experimental design*

442 All data presented in this study were gathered from two controlled greenhouse experiments and  
443 one controlled growth chamber experiment performed at the University of California-Davis. The  
444 main study was carried out in the winter/spring of 2018, while the complementary study was a  
445 small pilot experiment carried out in the summer of 2017, and the growth chamber experiment  
446 was carried out in the winter of 2019.

447

### 448 *Main Experiment*

449 Twenty plastic containers holding 16 individual pots were arranged in a 5-by-4 configuration.  
450 Single seedlings were transplanted to each pot, and watering regimes were assigned to plastic  
451 containers in a randomized complete block design: each drought treatment (D1, D2, D3) was  
452 assigned to 4 blocks, while the well-watered treatment (WC) was assigned to 8 blocks (**SFigure**  
453 **10**). The additional WC replicates were exclusively used to train the random forests models. Ten  
454 days after seedling transplantation, samples were collected every ~10 days (**Figure 1A**) for a total  
455 of 13 collection time points spanning 136 days. This design resulted in 4 biological replicates per  
456 treatment and collection time point combination.

### 457 *Complementary experiment*

458 Fifty potted plants were randomly assigned to one of two watering regimes: drought-stress  
459 treatment (DS) or well-watered controls (WC). Samples were collected at the 28, 35, 42, 49, and  
460 56-day marks, encompassing 1 pre-drought, 3 drought, and 1 post-drought time points. This  
461 design resulted in 5 biological replicates per treatment and collection time point combination.

### 462 *Semi-sterile phenotyping experiment*

463 One hundred and fifty-six seeds were inoculated with either SLBN-177, SLBN-111, or a mock

464 treatment in closed, sterile 75-ml culture tubes. After 10 days, half of the seedlings inoculated with  
465 each treatment began a two week period of drought stress followed by a week of recovery, at  
466 which point the plants were harvested.

467

#### 468 ***Plant growth***

469 The rice variety used in this study was cultivar M206, an *Oryza sativa* subsp. *japonica* accession  
470 grown in California. Dehulled seeds were treated with a 50% bleach solution for 5 minutes  
471 followed by 5 washes with sterile water. Surface sterilized seeds were plated on Murashige and  
472 Skoog (MS) agar, and germinated in a growth chamber for 7 days. Seedlings were then  
473 transplanted to pots holding agricultural soil collected from a rice field in Arbuckle, California  
474 (39°0'42.235"N, 121°55'19.632"W).

475

#### 476 ***Watering regimes***

477 During non-drought periods, plants were irrigated *ad libitum* to keep the soil under submergence.  
478 Drought was imposed by draining all water from the plastic containers and allowing soils to dry.  
479 In the main experiment, DS1, DS2, and DS3 drought treatments started 41 days after  
480 transplantation and lasted for 11, 21, and 33 days, respectively (**SFigure 1B**). In the  
481 complementary study, drought started 28 days after transplantation and lasted for 21 days. At the  
482 end of the drought period, water was added to the plastic containers to recover the plants.

483

#### 484 ***Gravimetric water content measurements***

485 For each pot collected, soil samples were harvested and placed in 15-ml Falcon tubes. After  
486 recording the initial weight, samples were allowed to dry inside a 42°C oven for 4 months. The  
487 dry weight of the samples was recorded and the percentage of moisture was calculated.

488

#### 489 ***Isolation of microbes***

490 Bacterial colonies were isolated from rhizosphere and endosphere communities of rice plants  
491 derived from a previous study [12]. Briefly, rice plants were grown in three different agricultural  
492 soils (including the one used in this experiment) under controlled greenhouse conditions. One  
493 month-old plants were drought-stressed for three weeks and root systems were harvested.  
494 Isolates were then collected by plating both rhizosphere soil and ground root tissue resuspended  
495 in sterile phosphate-buffered solution on Actinomycete Isolation Agar (Himedia).

496

#### 497 ***Semi-sterile phenotyping experiment***

498 Glass culture tubes (75 mL) were filled with 15 g wetted calcined clay. This setup was autoclaved  
499 twice for one hour with 24 hours between autoclave cycles. Rice seeds were sterilized by  
500 submerging seeds in 50% bleach for 15 minutes followed by 5 minutes of 70% EtOH, followed by  
501 five washes with sterilized H<sub>2</sub>O. Sterile seeds were placed in each tube. Isolate SLBN177 and  
502 SLBN111 were grown in LB liquid media and diluted in half-strength Murashige-Skoog media with  
503 no added sugar to an OD of 0.01. Ten mL of sterile MS or MS with one of the isolates were added  
504 to each seeded tube. Plants were grown in sterile conditions for 10 days. After this period, the  
505 culture tube lids were removed, and half the tubes were allowed to dry out for 14 days. The other  
506 half were watered periodically (2-3 days as needed) with sterilized H<sub>2</sub>O. After the drought period,  
507 all plants were well watered for a 7 day recovery period. Thereafter, plants were harvested, and  
508 shoot and root length and fresh weight were measured, as well as the number of leaves and roots.  
509 Sections of the roots were washed and flash frozen for 16S amplicon sequencing .

510

#### 511 ***Microbiome sample collection, processing, and DNA extraction.***

512 Root sample collection, compartment processing, and DNA extraction were performed as  
513 previously described [60]. Briefly, we scooped whole plants outside the pots and shook vigorously  
514 to remove all the soil not firmly attached to the roots. We then collected the 5 cm of root tissue  
515 immediately below the shoot-root junction in a 50-mL Falcon tube filled with 15 mL of sterile  
516 phosphate-buffered solution. Rhizosphere samples were collected by vortexing the roots and  
517 collecting 500 µl of the resulting soil suspension in PowerBead tubes (Mo Bio Laboratories).  
518 Endosphere samples were collected by washing the roots in fresh PBS to further discard any  
519 remaining soil and sonicating them three times (50 to 60 Hz for 30 s). Sonicated roots were placed  
520 in PowerBead tubes and homogenized by intense agitation for 1 min (Mini Beadbeater; BioSpec  
521 Products). DNA extractions were performed immediately after compartment separation, following  
522 the PowerSoil DNA isolation kit (Mo Bio Laboratories) protocol.

523

#### 524 ***16S amplicon library preparation***

525 Library construction followed a previously described dual- indexing strategy [60, 61]. For 16S  
526 rRNA gene libraries, the V4 region was amplified using the universal primers 515F and 806R.  
527 Amplification was carried out with the following touchdown PCR program: a first phase consisting  
528 of 95°C for 5 min, followed by 7 cycles of 95°C for 45 s, 65°C for 1 min (decreasing at 2°C/cycle),  
529 and 72°C for 90 s, with a second phase consisting of 30 cycles of 95°C for 45 s, 50°C for 30 s,  
530 and 72°C for 90 s, followed by a final extension at 72°C for 10 min. All PCR amplifications were  
531 performed using the HotStar HiFidelity polymerase kit (Qiagen). After running a 1% agarose gel



532 to verify proper amplification, libraries were cleaned with AmPure XP magnetic beads (Beckman  
533 Coulter, Inc.), quantified (Qubit dsDNA HS assay kit; Thermo Fisher Scientific), and pooled in  
534 equimolar concentrations. Pooled libraries were then concentrated, gel purified (Nucleosomic gel  
535 and PCR cleanup kit; Macherey-Nagel), quality checked (BioAnalyzer HS DNA kit; Agilent  
536 Technologies), and submitted for 2- by 250-bp Miseq sequencing (Illumina) to the DNA  
537 Technologies and Expression Analysis Cores at the UC Davis Genome Center (supported by NIH  
538 Shared Instrumentation Grant 1S10OD010786-01).

539

#### 540 **16S amplicon sequence processing**

541 The paired-end reads were demultiplexed with custom scripts  
542 (<https://github.com/bulksoil/BananaStand>) and assembled into single sequences with PANDAseq  
543 [62]. Chimeric sequences were detected and discarded with usearch61[63]. OTU clustering at  
544 97% identity was performed with the QIIME [64] implementation of UCLUST [63], using a close  
545 reference strategy against the 13\_8 release of the Greengenes 16S sequence database [65].  
546 OTUs classified as mitochondria and chloroplast were discarded from the OTU table (except in  
547 the semi-sterile phenotyping experiment), and non-prevalent OTUs (defined as OTUs not present  
548 in at least 5% of our samples) were filtered out.

549

#### 550 **Genome sequencing**

551 SLBN-177 was grown in liquid LB for 24 hours and DNA was extracted with Qiagen Blood and  
552 Tissue kit. DNA sequencing was done in the laboratory of Dr. Bart Weimer (UC Davis) as part of  
553 the 100K Pathogen Genome Project [66] as previously described [67–70]. Approximately 600 ng  
554 of purified gDNA was used to construct a sequencing library using KAPA HyperPlus library  
555 preparation kit (Roche Diagnostics). Final library QC for size distribution verification was done on  
556 Caliper Lab Chip <sup>GX</sup> (Perkin Elmer) and library quantification was done using KAPA Library  
557 Quantification Kit (Roche Diagnostics). Pooled libraries were sequenced on the Illumina HiSeq X  
558 Ten using a PE150 protocol. Reads were trimmed with Trimmomatic [71], assembled with  
559 SPAdes [72], and annotated with prokka [73], all with default settings. Contigs shorter than 1000  
560 bp or with an average coverage less than 20X were excluded. KEGG Ontology terms were  
561 extracted from the prokka output using the script Prokka2KEGG  
562 (<https://github.com/SilentGene/Bio-py/tree/master/prokka2kegg>). Secondary metabolite  
563 biosynthesis gene clusters were identified using antiSMASH [74].

564

565

566 **Statistical analyses**

567 All analyses were conducted in the R Environment version 3.5.1 [75]. For beta-diversity analyses,  
568 we used phyloseq [76] to calculate weighted UniFrac distances [77] on OTU counts normalized  
569 via variance-stabilizing transformation [78, 79]. Unconstrained principal-coordinate analysis was  
570 performed with the pcoa function from the ape package [80]. Permutational multivariate analyses  
571 of variance and canonical analyses of principal coordinates were performed with vegan [81].  
572 Differential abundance analyses were performed with DESeq2 [78, 79]. Random forest modelling  
573 was performed using the randomForest package [82]. All plots were generated with ggplot2 [83].

574

575 *Data availability*

576 Raw reads have been deposited in the SRA under Bioproject PRJNA551661.

577

578 *Code availability*

579 All scripts and intermediate files have been deposited in GitHub  
580 (<https://github.com/cmsantosm/RiceDroughtRecovery>).

581

582

**References**

- 583 1. Lesk C, Rowhani P, Ramankutty N. Influence of extreme weather disasters on global crop  
584 production. *Nature* 2016; **529**: 84–87.
- 585 2. code Baas S, Conforti P, Ahmed S, Markova G. The impact of disasters and crises on  
586 agriculture and food security, 2017. 2018.
- 587 3. National Oceanographic and Atmospheric Administration. US billion-dollar weather and  
588 climate disasters. 2018.
- 589 4. Zhang J, Zhang S, Cheng M, Jiang H, Zhang X, Peng C, et al. Effect of Drought on  
590 Agronomic Traits of Rice and Wheat: A Meta-Analysis. *Int J Environ Res Public Health*  
591 2018; **15**.
- 592 5. Hirasawa T, Ito O, Hardy B. Physiological characterization of the rice plant for tolerance of  
593 water deficit. *Genetic improvement of rice for water-limited environments Los Baños,*  
594 *Philippines: International Rice Research Institute* 1999; 89–98.

- 595 6. Pandey V, Shukla A. Acclimation and Tolerance Strategies of Rice under Drought Stress.  
596 *Rice Sci* 2015; **22**: 147–161.
- 597 7. Compant S, van der Heijden MGA, Sessitsch A. Climate change effects on beneficial plant-  
598 microorganism interactions. *FEMS Microbiol Ecol* 2010; **73**: 197–214.
- 599 8. de Vries FT, Griffiths RI, Knight CG, Nicolitch O, Williams A. Harnessing rhizosphere  
600 microbiomes for drought-resilient crop production. *Science* 2020; **368**: 270–274.
- 601 9. Busby PE, Soman C, Wagner MR, Friesen ML, Kremer J, Bennett A, et al. Research  
602 priorities for harnessing plant microbiomes in sustainable agriculture. *PLoS Biol* 2017; **15**:  
603 e2001793.
- 604 10. Trivedi P, Leach JE, Tringe SG, Sa T, Singh BK. Plant–microbiome interactions: from  
605 community assembly to plant health. *Nat Rev Microbiol* 2020.
- 606 11. Liu H, Brettell LE, Qiu Z, Singh BK. Microbiome-Mediated Stress Resistance in Plants.  
607 *Trends Plant Sci* 2020.
- 608 12. Santos-Medellín C, Edwards J, Liechty Z, Nguyen B, Sundaresan V. Drought Stress  
609 Results in a Compartment-Specific Restructuring of the Rice Root-Associated Microbiomes.  
610 *MBio* 2017; **8**: e00764–17.
- 611 13. Naylor D, DeGraaf S, Purdom E, Coleman-Derr D. Drought and host selection influence  
612 bacterial community dynamics in the grass root microbiome. *ISME J* 2017.
- 613 14. Fitzpatrick CR, Copeland J, Wang PW, Guttman DS, Kotanen PM, Johnson MTJ. Assembly  
614 and ecological function of the root microbiome across angiosperm plant species.  
615 *Proceedings of the National Academy of Sciences* 2018.
- 616 15. Shi S, Nuccio E, Herman DJ, Rijkers R, Estera K, Li J, et al. Successional Trajectories of  
617 Rhizosphere Bacterial Communities over Consecutive Seasons. *MBio* 2015; **6**: e00746.
- 618 16. Dombrowski N, Schlaeppi K, Agler MT, Hacquard S, Kemen E, Garrido-Oter R, et al. Root  
619 microbiota dynamics of perennial *Arabis alpina* are dependent on soil residence time but  
620 independent of flowering time. *ISME J* 2017; **11**: 43–55.

- 621 17. Edwards JA, Santos-Medellín CM, Liechty ZS, Nguyen B, Lurie E, Eason S, et al.  
622 Compositional shifts in root-associated bacterial and archaeal microbiota track the plant life  
623 cycle in field-grown rice. *PLoS Biol* 2018; **16**: e2003862.
- 624 18. Xu L, Naylor D, Dong Z, Simmons T, Pierroz G, Hixson KK, et al. Drought delays  
625 development of the sorghum root microbiome and enriches for monoderm bacteria. *Proc*  
626 *Natl Acad Sci U S A* 2018; **115**: E4284–E4293.
- 627 19. Walters WA, Jin Z, Youngblut N, Wallace JG, Sutter J, Zhang W, et al. Large-scale  
628 replicated field study of maize rhizosphere identifies heritable microbes. *Proc Natl Acad Sci*  
629 *U S A* 2018; 201800918.
- 630 20. Zhang J, Zhang N, Liu Y-X, Zhang X, Hu B, Qin Y, et al. Root microbiota shift in rice  
631 correlates with resident time in the field and developmental stage. *Sci China Life Sci* 2018;  
632 **61**: 613–621.
- 633 21. Masson-Delmotte V, Zhai P, Pörtner H-O, Roberts D, Skea J, Shukla PR, et al. Global  
634 warming of 1.5 C. *An IPCC Special Report on the impacts of global warming of 2018*; **1**.
- 635 22. Rong X, Huang Y. Taxonomic evaluation of the *Streptomyces griseus* clade using  
636 multilocus sequence analysis and DNA-DNA hybridization, with proposal to combine 29  
637 species and three subspecies as 11 genomic species. *Int J Syst Evol Microbiol* 2010; **60**:  
638 696–703.
- 639 23. Lin L, Xu X. Indole-3-acetic acid production by endophytic *Streptomyces* sp. En-1 isolated  
640 from medicinal plants. *Curr Microbiol* 2013; **67**: 209–217.
- 641 24. Legault GS, Lerat S, Nicolas P, Beaulieu C. Tryptophan regulates thaxtomin A and indole-  
642 3-acetic acid production in *Streptomyces scabiei* and modifies its interactions with radish  
643 seedlings. *Phytopathology* 2011; **101**: 1045–1051.
- 644 25. Ward JK, Tissue DT, Thomas RB, And, Strain BR. Comparative responses of model C3  
645 and C4 plants to drought in low and elevated CO<sub>2</sub>. *Glob Chang Biol* 1999; **5**: 857–867.
- 646 26. Ripley B, Frole K, Gilbert M. Differences in drought sensitivities and photosynthetic

- 647 limitations between co-occurring C3 and C4 (NADP-ME) Panicoid grasses. *Ann Bot* 2010;  
648 **105**: 493–503.
- 649 27. Fang Y, Xiong L. General mechanisms of drought response and their application in drought  
650 resistance improvement in plants. *Cell Mol Life Sci* 2015; **72**: 673–689.
- 651 28. de Vries FT, Shade A. Controls on soil microbial community stability under climate change.  
652 *Front Microbiol* 2013; **4**: 265.
- 653 29. Borken W, Matzner E. Reappraisal of drying and wetting effects on C and N mineralization  
654 and fluxes in soils. *Glob Chang Biol* 2009; **15**: 808–824.
- 655 30. de Vries FT, Griffiths RI, Bailey M, Craig H, Girlanda M, Gweon HS, et al. Soil bacterial  
656 networks are less stable under drought than fungal networks. *Nat Commun* 2018; **9**: 3033.
- 657 31. Liechty Z, Santos-Medellín C, Edwards J, Nguyen B, Mikhail D, Eason S, et al.  
658 Comparative Analysis of Root Microbiomes of Rice Cultivars with High and Low Methane  
659 Emissions Reveals Differences in Abundance of Methanogenic Archaea and Putative  
660 Upstream Fermenters. *mSystems* 2020; **5**.
- 661 32. Lueders T, Friedrich MW. Effects of amendment with ferrihydrite and gypsum on the  
662 structure and activity of methanogenic populations in rice field soil. *Appl Environ Microbiol*  
663 2002; **68**: 2484–2494.
- 664 33. Linqvist BA, Anders MM, Adviento-Borbe MAA, Chaney RL, Nalley LL, da Rosa EFF, et al.  
665 Reducing greenhouse gas emissions, water use, and grain arsenic levels in rice systems.  
666 *Glob Chang Biol* 2015; **21**: 407–417.
- 667 34. Speirs LBM, Rice DTF, Petrovski S, Seviour RJ. The Phylogeny, Biodiversity, and Ecology  
668 of the Chloroflexi in Activated Sludge. *Front Microbiol* 2019; **10**: 2015.
- 669 35. Thomas SH, Wagner RD, Arakaki AK, Skolnick J, Kirby JR, Shimkets LJ, et al. The mosaic  
670 genome of *Anaeromyxobacter dehalogenans* strain 2CP-C suggests an aerobic common  
671 ancestor to the delta-proteobacteria. *PLoS One* 2008; **3**: e2103.
- 672 36. Yang TH, Coppi MV, Lovley DR, Sun J. Metabolic response of *Geobacter sulfurreducens*

- 673 towards electron donor/acceptor variation. *Microb Cell Fact* 2010; **9**: 90.
- 674 37. Keller KL, Wall JD. Genetics and molecular biology of the electron flow for sulfate  
675 respiration in desulfovibrio. *Front Microbiol* 2011; **2**: 135.
- 676 38. Zhalnina K, Louie KB, Hao Z, Mansoori N, da Rocha UN, Shi S, et al. Dynamic root  
677 exudate chemistry and microbial substrate preferences drive patterns in rhizosphere  
678 microbial community assembly. *Nat Microbiol* 2018.
- 679 39. Gargallo-Garriga A, Preece C, Sardans J, Oravec M, Urban O, Peñuelas J. Root exudate  
680 metabolomes change under drought and show limited capacity for recovery. *Sci Rep* 2018;  
681 **8**: 12696.
- 682 40. Canarini A, Merchant A, Dijkstra FA. Drought effects on Helianthus annuus and Glycine  
683 max metabolites: from phloem to root exudates. *Rhizosphere* 2016; **2**: 85–97.
- 684 41. Williams A, de Vries FT. Plant root exudation under drought: implications for ecosystem  
685 functioning. *New Phytol* 2020; **225**: 1899–1905.
- 686 42. Vries FT, Williams A, Stringer F, Willcocks R, McEwing R, Langridge H, et al. Changes in  
687 root-exudate-induced respiration reveal a novel mechanism through which drought affects  
688 ecosystem carbon cycling. *New Phytol* 2019; **224**: 132–145.
- 689 43. Hazman M, Brown KM. Progressive drought alters architectural and anatomical traits of rice  
690 roots. *Rice* 2018; **11**: 62.
- 691 44. Saleem M, Law AD, Sahib MR, Pervaiz ZH, Zhang Q. Impact of root system architecture on  
692 rhizosphere and root microbiome. *Rhizosphere* 2018; **6**: 47–51.
- 693 45. Pérez-Jaramillo JE, Carrión VJ, Bosse M, Ferrão LFV, de Hollander M, Garcia AAF, et al.  
694 Linking rhizosphere microbiome composition of wild and domesticated *Phaseolus vulgaris*  
695 to genotypic and root phenotypic traits. *ISME J* 2017.
- 696 46. Kang D-J, Futakuchi K. Effect of Moderate Drought-Stress on Flowering Time of  
697 Interspecific Hybrid Progenies (*Oryza sativa* L. × *Oryza glaberrima* Steud.). *J Crop Sci*  
698 *Biotechnol* 2019; **22**: 75–81.

- 699 47. Pantuwan G, Fukai S, Cooper M, Rajatasereekul S, O'Toole JC. Yield response of rice  
700 (*Oryza sativa* L.) genotypes to different types of drought under rainfed lowlands: Part 1.  
701 Grain yield and yield components. *Field Crops Res* 2002; **73**: 153–168.
- 702 48. Zhang C, Liu J, Zhao T, Gomez A, Li C, Yu C, et al. A Drought-Inducible Transcription  
703 Factor Delays Reproductive Timing in Rice. *Plant Physiol* 2016; **171**: 334–343.
- 704 49. Lafitte HR, Price AH, Courtois B. Yield response to water deficit in an upland rice mapping  
705 population: associations among traits and genetic markers. *Theor Appl Genet* 2004; **109**:  
706 1237–1246.
- 707 50. Guo X, Zhang X, Qin Y, Liu Y-X, Zhang J, Zhang N, et al. Host-Associated Quantitative  
708 Abundance Profiling Reveals the Microbial Load Variation of Root Microbiome. *Plant*  
709 *Communications* 2020; **1**: 100003.
- 710 51. Glick BR. Modulating Phytohormone Levels. In: Glick BR (ed). *Beneficial Plant-Bacterial*  
711 *Interactions*. 2015. Springer International Publishing, Cham, pp 65–96.
- 712 52. Aznar A, Dellagi A. New insights into the role of siderophores as triggers of plant immunity:  
713 what can we learn from animals? *J Exp Bot* 2015; **66**: 3001–3010.
- 714 53. Viaene T, Langendries S, Beirinckx S, Maes M, Goormachtig S. *Streptomyces* as a plant's  
715 best friend? *FEMS Microbiol Ecol* 2016; **92**.
- 716 54. Meena KK, Sorty AM, Bitla UM, Choudhary K, Gupta P, Pareek A, et al. Abiotic Stress  
717 Responses and Microbe-Mediated Mitigation in Plants: The Omics Strategies. *Front Plant*  
718 *Sci* 2017; **8**: 172.
- 719 55. Mukamuhirwa A, Persson Hovmalm H, Ortiz R, Nyamangyoku O, Prieto-Linde ML, Ekholm  
720 A, et al. Effect of intermittent drought on grain yield and quality of rice (*Oryza sativa* L.)  
721 grown in Rwanda. *J Agro Crop Sci* 2020; **206**: 252–262.
- 722 56. Fleta-Soriano E, Munné-Bosch S. Stress Memory and the Inevitable Effects of Drought: A  
723 Physiological Perspective. *Front Plant Sci* 2016; **7**: 143.
- 724 57. Ding Y, Fromm M, Avramova Z. Multiple exposures to drought 'train' transcriptional

- 725 responses in Arabidopsis. *Nat Commun* 2012; **3**: 740.
- 726 58. Suralta RR, Niones JM, Kano-Nakata M, Thi Tran T, Mitsuya S, Yamauchi A. Plasticity in  
727 nodal root elongation through the hardpan triggered by rewatering during soil moisture  
728 fluctuation stress in rice. *Sci Rep* 2018; **8**: 4341.
- 729 59. de la Fuente Cantó C, Simonin M, King E, Moulin L, Bennett MJ, Castrillo G, et al. An  
730 extended root phenotype: the rhizosphere, its formation and impacts on plant fitness. *Plant*  
731 *J* 2020; **103**: 951–964.
- 732 60. Edwards J, Santos-Medellín C, Sundaresan V. Extraction and 16S rRNA Sequence  
733 Analysis of Microbiomes Associated with Rice Roots. *BIO-PROTOCOL* 2018; **8**.
- 734 61. Caporaso JG, Lauber CL, Walters WA, Berg-Lyons D, Lozupone CA, Turnbaugh PJ, et al.  
735 Global patterns of 16S rRNA diversity at a depth of millions of sequences per sample. *Proc*  
736 *Natl Acad Sci U S A* 2011; **108 Suppl 1**: 4516–4522.
- 737 62. Masella AP, Bartram AK, Truszkowski JM, Brown DG, Neufeld JD. PANDAseq: paired-end  
738 assembler for illumina sequences. *BMC Bioinformatics* 2012; **13**: 31.
- 739 63. Edgar RC. Search and clustering orders of magnitude faster than BLAST. *Bioinformatics*  
740 2010; **26**: 2460–2461.
- 741 64. Caporaso JG, Kuczynski J, Stombaugh J, Bittinger K, Bushman FD, Costello EK, et al.  
742 QIIME allows analysis of high-throughput community sequencing data. *Nat Methods* 2010;  
743 **7**: 335–336.
- 744 65. DeSantis TZ, Hugenholtz P, Larsen N, Rojas M, Brodie EL, Keller K, et al. Greengenes, a  
745 chimera-checked 16S rRNA gene database and workbench compatible with ARB. *Appl*  
746 *Environ Microbiol* 2006; **72**: 5069–5072.
- 747 66. Weimer BC. 100K Pathogen Genome Project. *Genome Announc* 2017; **5**.
- 748 67. Bandyopadhyay DD, Weimer BC. Biological Machine Learning Combined with Campylobacter  
749 Population Genomics Reveals Virulence Gene Allelic Variants Cause Disease.  
750 *Microorganisms* 2020; **8**.



- 751 68. Higdon SM, Pozzo T, Tibbett EJ, Chiu C, Jeannotte R, Weimer BC, et al. Diazotrophic  
752 bacteria from maize exhibit multifaceted plant growth promotion traits in multiple hosts.  
753 *PLoS One* 2020; **15**: e0239081.
- 754 69. Campbell E, Gerst M, Huang BC, Kong N, Weimer BC, Yousef AE. Draft Genome  
755 Sequence of *Bacillus velezensis* CE2, Which Genetically Encodes a Novel Multicomponent  
756 Lantibiotic. *Microbiol Resour Announc* 2019; **8**.
- 757 70. Kong N, Davis M, Arabyan N, Huang BC, Weis AM, Chen P, et al. Draft Genome  
758 Sequences of 1,183 Salmonella Strains from the 100K Pathogen Genome Project. *Genome*  
759 *Announc* 2017; **5**.
- 760 71. Bolger AM, Lohse M, Usadel B. Trimmomatic: a flexible trimmer for Illumina sequence data.  
761 *Bioinformatics* 2014; **30**: 2114–2120.
- 762 72. Bankevich A, Nurk S, Antipov D, Gurevich AA, Dvorkin M, Kulikov AS, et al. SPAdes: a new  
763 genome assembly algorithm and its applications to single-cell sequencing. *J Comput Biol*  
764 2012; **19**: 455–477.
- 765 73. Seemann T. Prokka: rapid prokaryotic genome annotation. *Bioinformatics* 2014; **30**: 2068–  
766 2069.
- 767 74. Medema MH, Blin K, Cimermancic P, de Jager V, Zakrzewski P, Fischbach MA, et al.  
768 antiSMASH: rapid identification, annotation and analysis of secondary metabolite  
769 biosynthesis gene clusters in bacterial and fungal genome sequences. *Nucleic Acids Res*  
770 2011; **39**: W339–46.
- 771 75. R Core Team. R: A Language and Environment for Statistical Computing. 2018. R  
772 Foundation for Statistical Computing, Vienna, Austria.
- 773 76. McMurdie PJ, Holmes S. phyloseq: an R package for reproducible interactive analysis and  
774 graphics of microbiome census data. *PLoS One* 2013; **8**: e61217.
- 775 77. Lozupone C, Knight R. UniFrac: a new phylogenetic method for comparing microbial  
776 communities. *Appl Environ Microbiol* 2005; **71**: 8228–8235.

- 777 78. Love MI, Huber W, Anders S. Moderated estimation of fold change and dispersion for RNA-  
778 seq data with DESeq2. *Genome Biol* 2014; **15**: 550.
- 779 79. McMurdie PJ, Holmes S. Waste not, want not: why rarefying microbiome data is  
780 inadmissible. *PLoS Comput Biol* 2014; **10**: e1003531.
- 781 80. Paradis E, Claude J, Strimmer K. APE: Analyses of Phylogenetics and Evolution in R  
782 language. *Bioinformatics* 2004; **20**: 289–290.
- 783 81. Oksanen J, Blanchet FG, Friendly M, Kindt R, Legendre P, McGlinn D, et al. vegan:  
784 Community Ecology Package. 2018.
- 785 82. Liaw A, Wiener M. Classification and Regression by randomForest. *R News* . 2002. , **2**: 18–  
786 22
- 787 83. Wickham H. ggplot2: Elegant Graphics for Data Analysis. 2016. Springer-Verlag New York.

788

789

### Acknowledgments

790

791 This project was funded by the National Science Foundation (grant IOS 1444974) and the  
792 United States Department of Agriculture, Agricultural Experiment Station (project CA-D-XXX-  
793 6973-H). C.S.M. acknowledges support from the University of California Institute for Mexico  
794 (UCMEXUS), Consejo Nacional de Ciencia y Tecnología (CONACYT), and Secretaría de  
795 Educación Pública (México). C.S.M. and Z.L. also acknowledge partial support from the Elsie  
796 Taylor Stocking Memorial Research Fellowship and the Henry A. Jastro Graduate Research  
797 Award. J.E. is supported by USDA National Institute of Food and Agriculture Postdoctoral  
798 Fellowship [grant no. 2019-67012-2971/project accession no. 1019437]. We thank Dr. Ryan  
799 Melnyk for helpful advice regarding genome assembly, annotation, and interpretation.

800

801

### Author contributions

802

803 C.S.M., Z.L., and V.S. conceptualized the study; C.S.M, Z.L., J.E., and B.N. performed the  
804 experiments; B.H. and B.C.W. generated the SLBN177 genome sequence and reviewed  
805 manuscript; C.S.M and Z.L. analyzed the data; C.S.M., Z.L., J.E., and V.S. wrote the paper.

806

807

### **Competing interests**

808

809 The authors declare no competing interests.

810

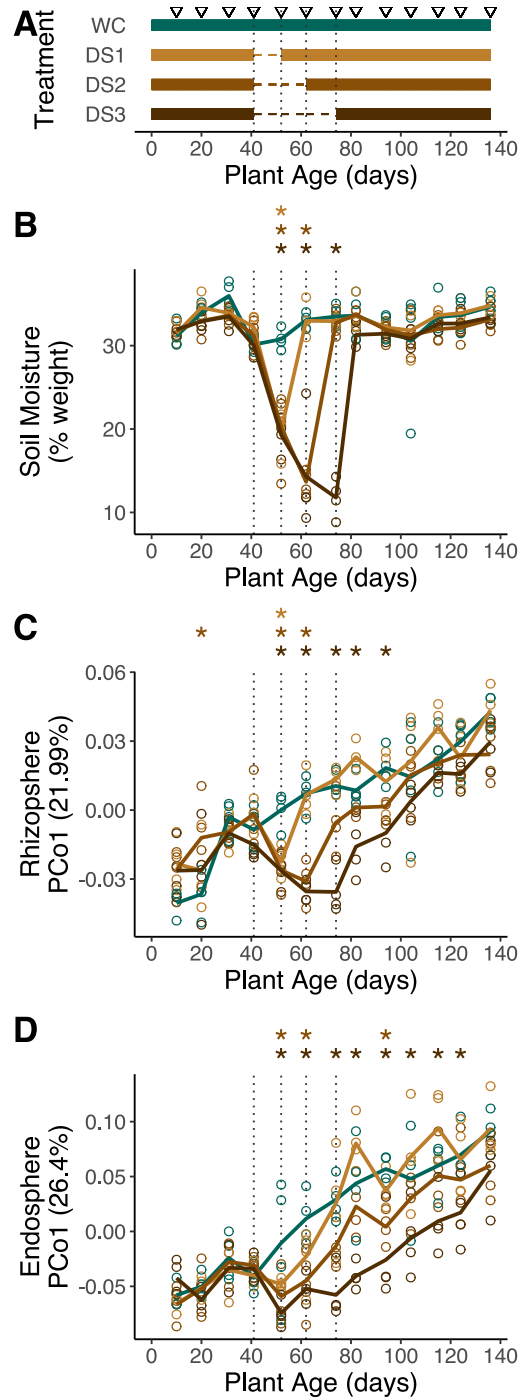

811  
812 **Figure 1.**  
813 **Compositional dynamics of rhizosphere and endosphere communities before, during, and after drought. (A)**  
814 **Timeline of the watering regimes followed by control (WC) and drought-treated (DS1, DS2, and DS3) plants. Horizontal**  
815 **lines represent the watering status during the experiment: solid segments indicate periods of constant irrigation while**  
816 **dotted segments indicate periods of suspended irrigation. Upside down triangles mark each of 13 collection time points**  
817 **spanning the complete life cycle of rice plants. (B) Soil percent moisture as measured by gravimetric water content (C,**  
818 **D) Beta-diversity patterns in the rhizosphere (C) and endosphere (D) communities. In both cases, the y-axis displays**  
819 **the position of each sample across the first principal coordinate (PCo) from a weighted UniFrac PCo analysis and the**  
820 **x-axis displays the age of the plant at the moment of sample collection. The trend lines in panels B, C, and D represent**  
821 **the mean values for each treatment throughout the experiment; asterisks on top indicate a significant difference**  
822 **(ANOVA, adjusted  $P < 0.05$ ) between the control and each of the drought treatments at a specific time point.**

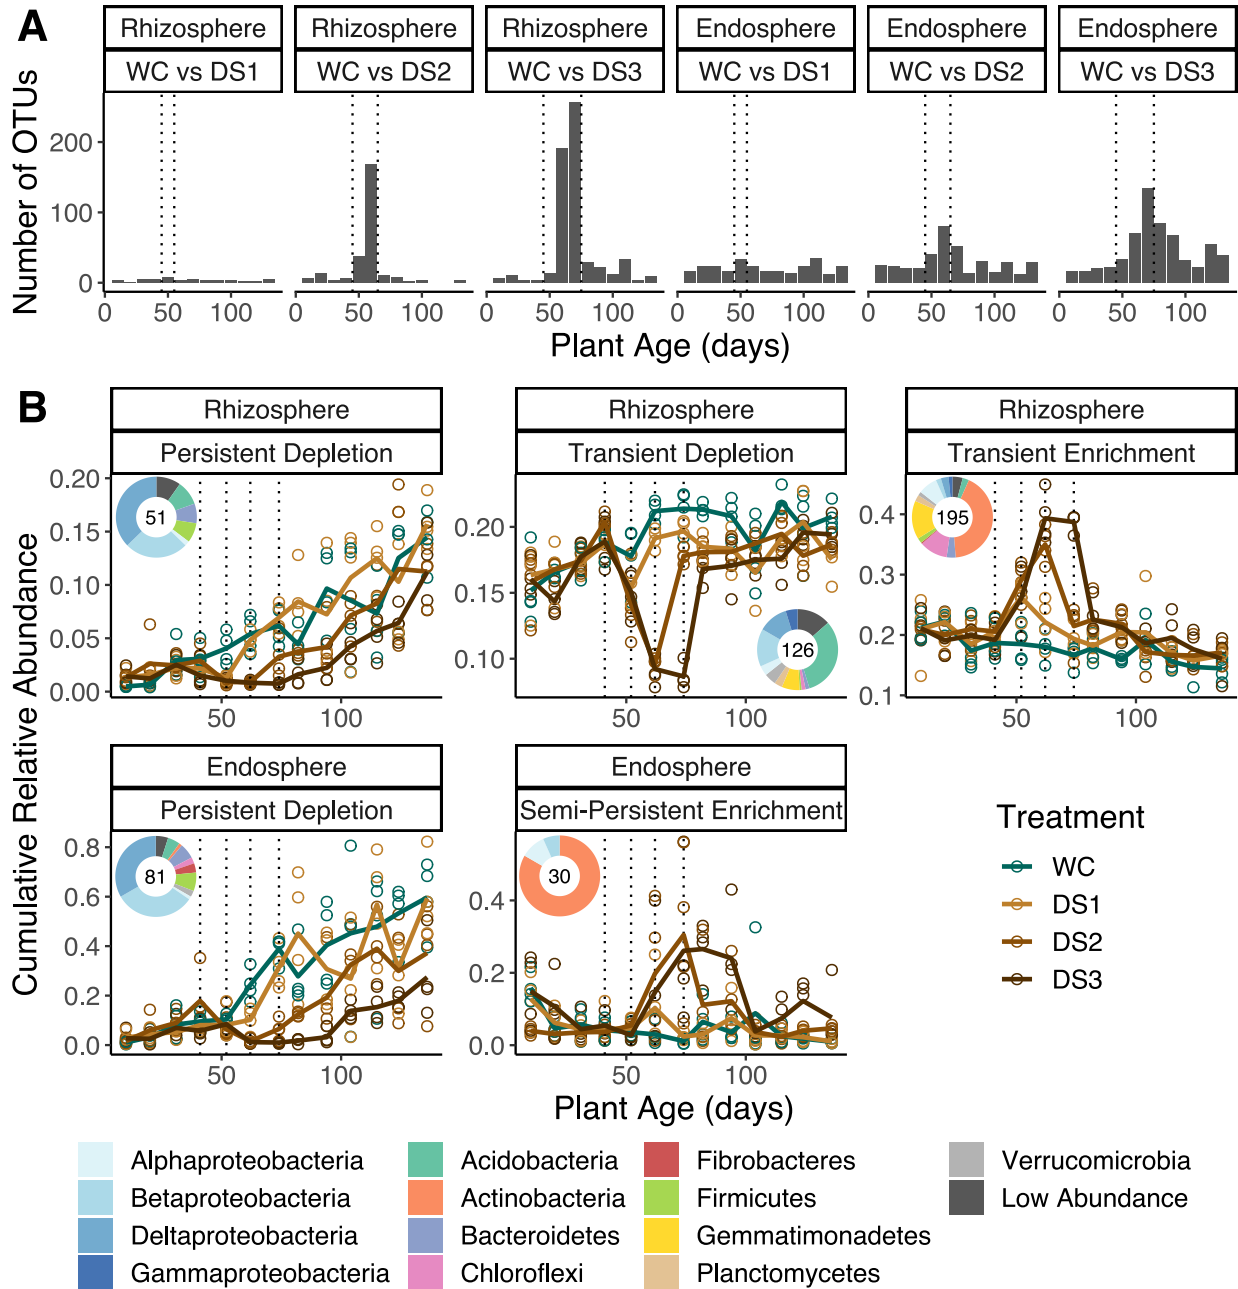

823  
824  
825  
826  
827  
828  
829  
830  
831  
832

**Figure 2.**

**Drought-responsive OTUs show distinct longitudinal trends within and between compartments. (A)** Number of differentially abundant OTUs (Wald test, adjusted  $P < 0.05$ ) detected between well-watered controls and each of the drought treatments at each timepoint. **(B)** Longitudinal shifts in the cumulative relative abundances of rhizosphere and endosphere drought-responsive modules detected through hierarchical clustering. The complete set of detected clusters is shown in Supplementary Figures 2-3. Trend lines represent the mean values for each treatment throughout the experiment and inset donut plots display the size (number of OTUs) and taxonomic composition of each module. In all panels, the vertical dotted lines delimit the periods of suspended irrigation for each of the drought treatments.

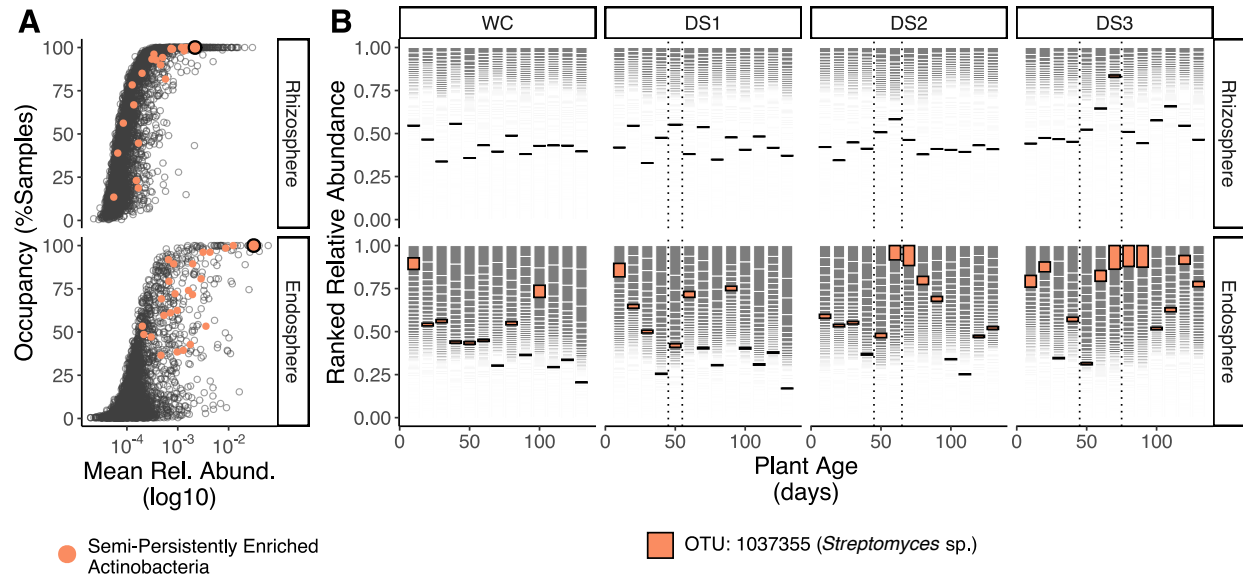

833  
834  
835  
836  
837  
838  
839  
840  
841  
842  
843  
844

**Figure 3.**

**A drought-enriched OTU becomes the most abundant member of the endosphere communities.** (A) Occupancy-abundance curves for the rhizosphere and endosphere communities. The x-axis displays the log-transformed mean relative abundance of each OTU while the y-axis displays the percent of samples in which each OTU was detected. Actinobacteria OTUs detected as semi-persistently enriched in the endosphere (Fig 2B) are colored in orange and OTU 1037355 is further highlighted by a black outline. (B) Ranked relative abundances of individual community members throughout time. Each stacked bar plot displays all the OTUs detected in a particular time point: the height of individual bars represent the mean relative abundance of each OTU while the bar position across the y-axis indicates its rank within the community. The most abundant member of the semi-persistent enrichment module, *Streptomyces* sp. (OTU ID: 1037355), is highlighted. In all panels, the vertical dotted lines delimit the periods of suspended irrigation in each of the drought treatments.

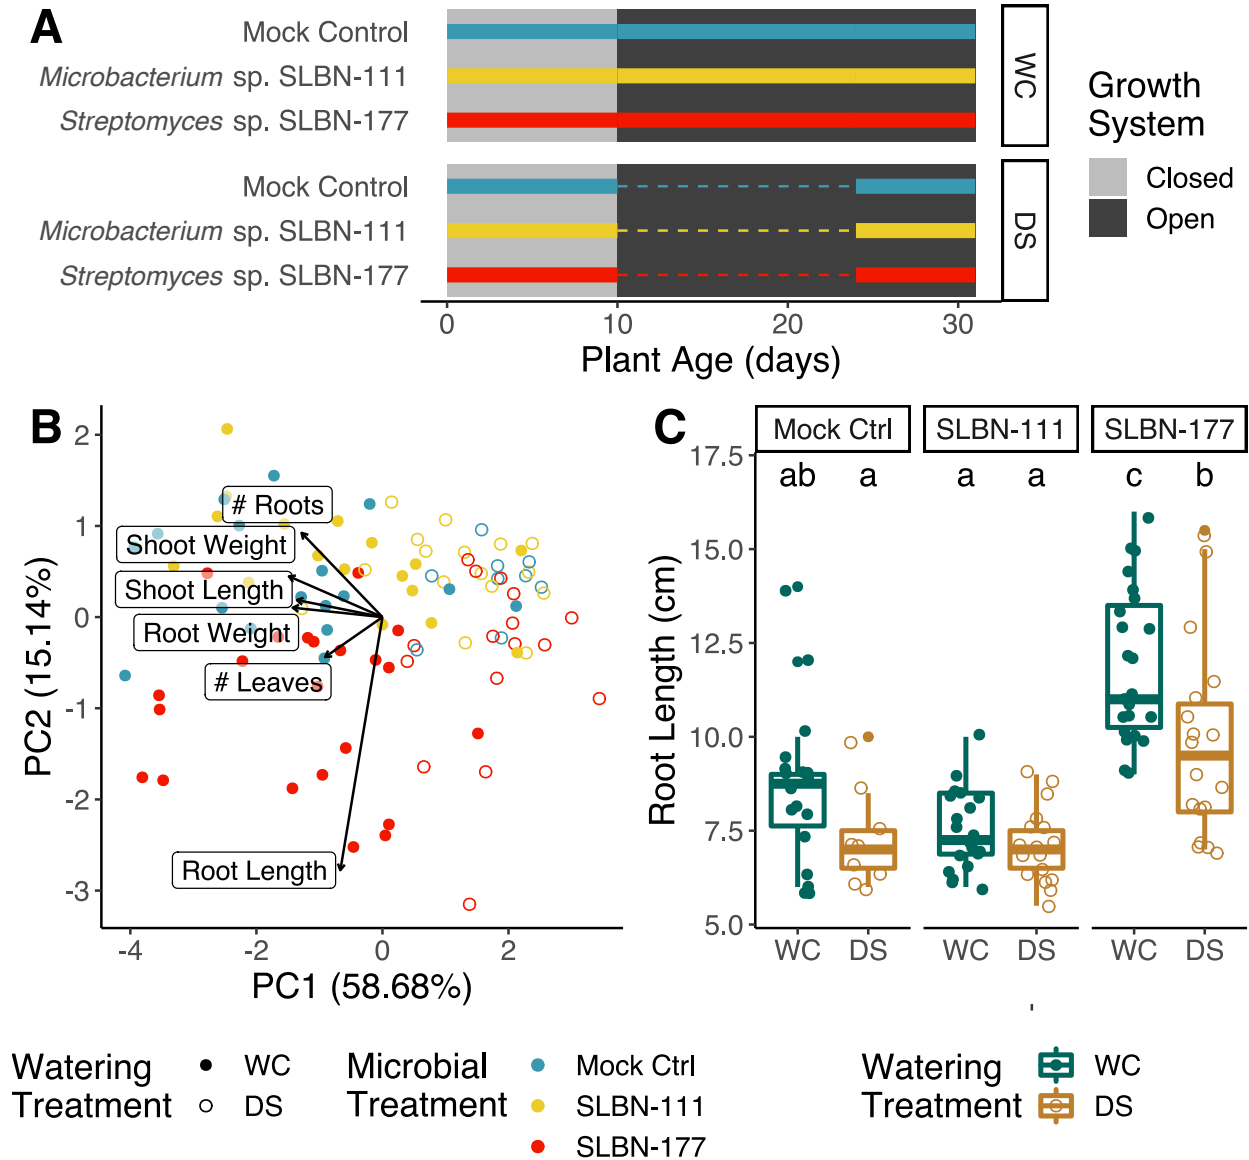

845  
 846  
 847  
 848  
 849  
 850  
 851  
 852  
 853  
 854  
 855  
 856

**Figure 4.**

***Streptomyces* sp. SLBN-177 significantly increases root length under controlled conditions.** (A) Timeline of the watering regimes followed by control (WC) and drought-treated (DS) plants. Horizontal lines represent the watering status during the experiment: solid segments indicate periods of constant irrigation while dotted segments indicate periods of suspended irrigation. Colors indicate the microbial treatment applied at the beginning of the experiment. The background colors indicate the periods during which the plant growth system was closed (*i.e.* axenic) or open. (B) Principal component analysis of plant phenotypes. Points represent individual plants harvested at the end of the experiment and vectors indicate the contribution of each of the measured variables. The microbial treatment and watering regime received by each plant are indicated by color and shape, respectively. (C) Distribution of root lengths across microbial treatments and watering regimes. Letters at the top indicate significantly different groupings (Tukey test, adjusted  $P < 0.05$ ).

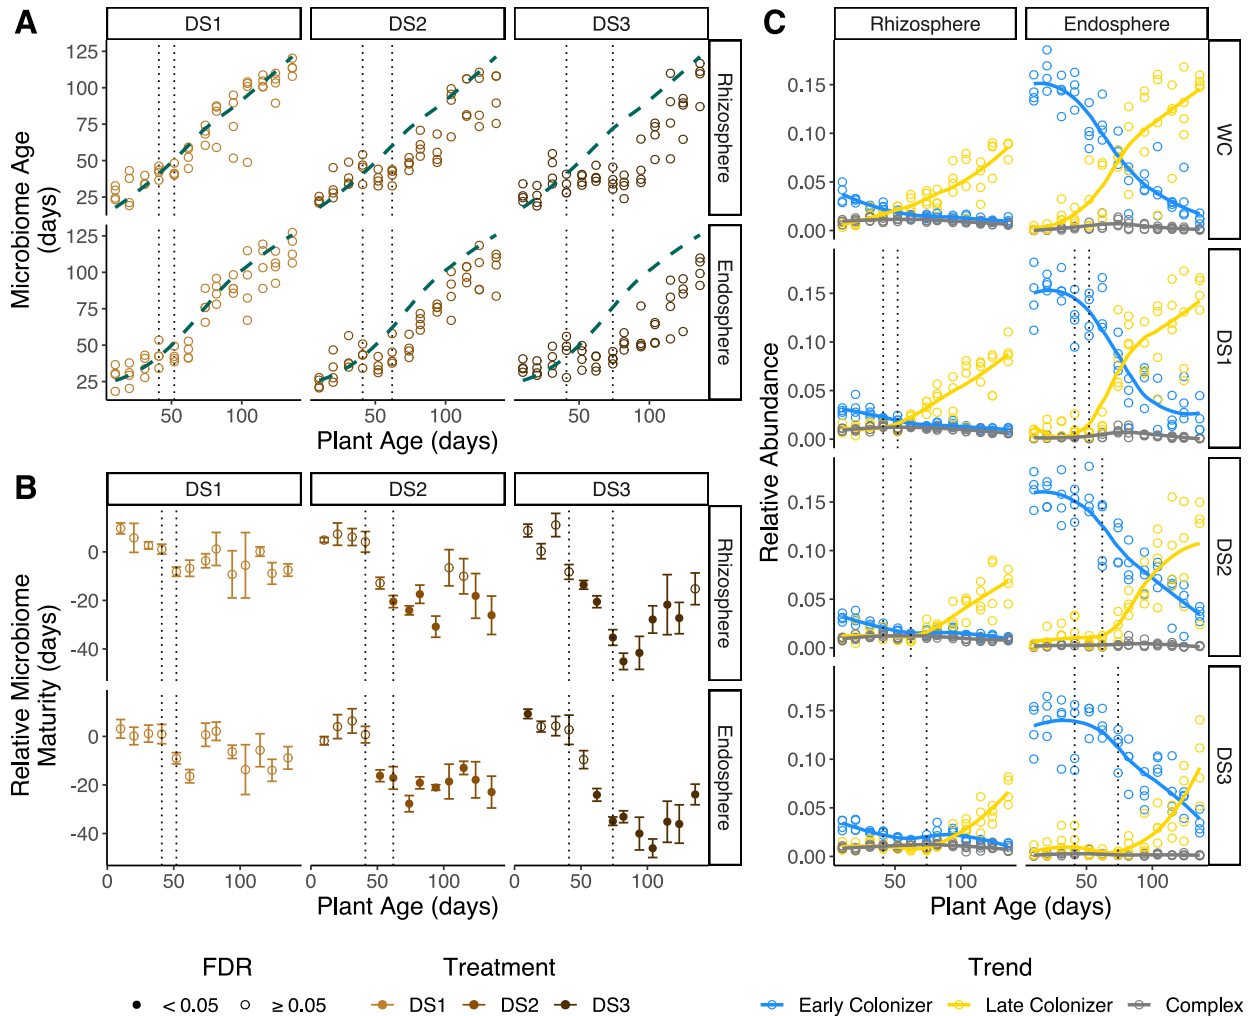

857  
 858 **Figure 5.**  
 859 **Persistent immaturity of root microbiomes in drought-stressed plants.** (A) Microbiome age predictions of  
 860 rhizosphere and endosphere communities across drought treatments (D1, D2, and D3). The dashed curve represents  
 861 the baseline microbiome development under well-irrigated conditions and was calculated by fitting a smoothed spline  
 862 between the predicted microbiome age and the chronological plant age in the control (WC) test set. (B) Relative  
 863 microbiome maturity measured as the difference between the predicted microbiome age and the interpolated value of  
 864 the smoothed spline at each sampling time point. Solid points indicate a significant difference (ANOVA, adjusted  $P <$   
 865  $0.05$ ) between the control and each of the drought treatments. (C) Longitudinal shifts in the aggregated relative  
 866 abundances of the early, late, and complex colonizers used in the random-forest models.  
 867

868

869



870 **Table 1.** Influence of experimental factors and their interaction on the beta-diversities of  
871 rhizosphere and endosphere communities.

|                  | Rhizosphere |       | Endosphere |       |
|------------------|-------------|-------|------------|-------|
|                  | $R^2$       | $P$   | $R^2$      | $P$   |
| Time             | 0.1491      | 0.001 | 0.1710     | 0.001 |
| Treatment        | 0.0459      | 0.001 | 0.0592     | 0.001 |
| Time x Treatment | 0.0171      | 0.047 | 0.0240     | 0.004 |
| Residuals        | 0.7879      |       | 0.7457     |       |

872 Permutational multivariate analyses of variance were performed on weighted UniFrac distances.

873

874
